# Supplementary material for: Experimental and Analytical Approaches for Improving the Resolution of Randomly Barcoded Transposon Insertion Sequencing (RB-TnSeq) Studies
Source: PubMed Central journal article supplement (PMC9208016; doi:10.1021/acssynbio.2c00119), 2022-06-03
Supplement: sb2c00119_si_002.pdf [file sb2c00119_si_002.pdf]

## Supplementary Information for:

Experimental and analytical considerations for improving the resolution of randomly barcoded transposon insertion sequencing (RB-TnSeq) studies

Andrew Borchert,<sup>1,2\*</sup> Alissa Bleem,<sup>1,2\*</sup> and Gregg T. Beckham<sup>1,2#</sup>

<sup>1</sup>Renewable Resources and Enabling Sciences Center, National Renewable Energy Laboratory, Golden CO, United States

<sup>2</sup>Center for Bioenergy Innovation, Oak Ridge National Laboratory, Oak Ridge TN 37830, USA

\*Denotes equal contribution

#Corresponding author: [Gregg.Beckham@nrel.gov](mailto:Gregg.Beckham@nrel.gov)

**Table S1.** Summary of genes that passed the baseline cutoff (>30 gene counts) required for fitness analysis. The number of NGS reads associated with each sample is also provided.

| <b>Experiment / Replicate</b> | <b>Condition description</b> | <b>Genes included in analysis</b> | <b># Reads</b> |
|-------------------------------|------------------------------|-----------------------------------|----------------|
| 1A                            | M9 + 20 mM D-glucose (T=0)   | 4953                              | 5,618,453      |
| 1B                            | M9 + 20 mM D-glucose (T=0)   | 5022                              | 8,197,689      |
| 1C                            | M9 + 20 mM D-glucose (T=0)   | 5004                              | 7,186,676      |
| 2A                            | LB (T=0)                     | 5015                              | 7,514,940      |
| 2B                            | LB (T=0)                     | 4997                              | 7,338,799      |
| 2C                            | LB (T=0)                     | 5024                              | 8,310,257      |

**Table S2.** Experimental layout description with corresponding OD<sub>600</sub> readings taken at time of sampling. Values A, B, and C denote the biological replicate.

| <b>Experiment</b> | <b>Media composition and description</b> | <b>OD<sub>600nm</sub> A</b> | <b>OD<sub>600nm</sub> B</b> | <b>OD<sub>600nm</sub> C</b> |
|-------------------|------------------------------------------|-----------------------------|-----------------------------|-----------------------------|
| 1                 | M9 + 20 mM D-glucose (T=0)               | 1.153                       | 0.900                       | 0.990                       |
| 2                 | LB (T=0)                                 | 1.087                       | 1.265                       | 1.075                       |
| 3                 | M9 + 20 mM D-glucose (passaged from #1)  | 1.002                       | 1.090                       | 1.252                       |
| 4                 | M9 + 20 mM D-glucose (passaged from #2)  | 0.984                       | 0.944                       | 1.078                       |
| 5                 | M9 + 10 mM ferulate (passaged from #1)   | 1.056                       | 0.910                       | 1.285                       |

**Table S3.** BarSeq forward primers, BarSeq\_P2\_ITXXX, used in this study (original sequences from Wetmore *et al.*<sup>1</sup>). BarSeq P2 indices used for demultiplexing sequencing data are in bold.

| Experiment/<br>Replicate | Index<br>name | Index<br>sequence | BarSeq_P2 primer sequence                                                                        |
|--------------------------|---------------|-------------------|--------------------------------------------------------------------------------------------------|
| 1A                       | IT001         | ATCACG            | CAAGCAGAAGACGGCATAACGAGAT <b>CGTGAT</b> GTGACTGGAGTTCA<br>GACGTGTGCTCTTCCGATCTGATGTCCACGAGGTCTCT |
| 1B                       | IT002         | CGATGT            | CAAGCAGAAGACGGCATAACGAGAT <b>ACATCG</b> GTGACTGGAGTTCA<br>GACGTGTGCTCTTCCGATCTGATGTCCACGAGGTCTCT |
| 1C                       | IT003         | TTAGGC            | CAAGCAGAAGACGGCATAACGAGAT <b>GCCTAAG</b> TGACTGGAGTTCA<br>GACGTGTGCTCTTCCGATCTGATGTCCACGAGGTCTCT |
| 2A                       | IT004         | TGACCA            | CAAGCAGAAGACGGCATAACGAGAT <b>TGGTCA</b> GTGACTGGAGTTCA<br>GACGTGTGCTCTTCCGATCTGATGTCCACGAGGTCTCT |
| 2B                       | IT005         | ACAGTG            | CAAGCAGAAGACGGCATAACGAGAT <b>CACTGT</b> GTGACTGGAGTTCA<br>GACGTGTGCTCTTCCGATCTGATGTCCACGAGGTCTCT |
| 2C                       | IT006         | GCCAAT            | CAAGCAGAAGACGGCATAACGAGAT <b>ATTGGC</b> GTGACTGGAGTTCA<br>GACGTGTGCTCTTCCGATCTGATGTCCACGAGGTCTCT |
| 3A                       | IT007         | CAGATC            | CAAGCAGAAGACGGCATAACGAGAT <b>GATCTG</b> GTGACTGGAGTTCA<br>GACGTGTGCTCTTCCGATCTGATGTCCACGAGGTCTCT |
| 3B                       | IT008         | ACTTGA            | CAAGCAGAAGACGGCATAACGAGAT <b>TCAAGT</b> GTGACTGGAGTTCA<br>GACGTGTGCTCTTCCGATCTGATGTCCACGAGGTCTCT |
| 3C                       | IT009         | GATCAG            | CAAGCAGAAGACGGCATAACGAGAT <b>CTGATC</b> GTGACTGGAGTTCA<br>GACGTGTGCTCTTCCGATCTGATGTCCACGAGGTCTCT |
| 4A                       | IT010         | TAGCTT            | CAAGCAGAAGACGGCATAACGAGAT <b>AAGCTA</b> GTGACTGGAGTTCA<br>GACGTGTGCTCTTCCGATCTGATGTCCACGAGGTCTCT |
| 4B                       | IT011         | GGCTAC            | CAAGCAGAAGACGGCATAACGAGAT <b>GTAGCC</b> GTGACTGGAGTTCA<br>GACGTGTGCTCTTCCGATCTGATGTCCACGAGGTCTCT |
| 4C                       | IT012         | CTTGTA            | CAAGCAGAAGACGGCATAACGAGAT <b>TACAAG</b> GTGACTGGAGTTCA<br>GACGTGTGCTCTTCCGATCTGATGTCCACGAGGTCTCT |
| 5A                       | IT019         | GTGAAA            | CAAGCAGAAGACGGCATAACGAGAT <b>TTTCAC</b> GTGACTGGAGTTCA<br>GACGTGTGCTCTTCCGATCTGATGTCCACGAGGTCTCT |
| 5B                       | IT020         | GTGGCC            | CAAGCAGAAGACGGCATAACGAGAT <b>GGCCAC</b> GTGACTGGAGTTCA<br>GACGTGTGCTCTTCCGATCTGATGTCCACGAGGTCTCT |
| 5C                       | IT021         | GTTTCG            | CAAGCAGAAGACGGCATAACGAGAT <b>CGAAAC</b> GTGACTGGAGTTCA<br>GACGTGTGCTCTTCCGATCTGATGTCCACGAGGTCTCT |

**Table S4.** Sequencing read counts and quality metrics for each sample used in this work.

| <b>Experiment / Replicate</b> | <b># Reads</b> | <b>Yield (Mbp)</b> | <b>Mean Quality Score</b> |
|-------------------------------|----------------|--------------------|---------------------------|
| 1A                            | 5,618,453      | 1686               | 32.41                     |
| 1B                            | 8,197,689      | 2459               | 32.58                     |
| 1C                            | 7,186,676      | 2156               | 32.14                     |
| 2A                            | 7,514,940      | 2254               | 32.47                     |
| 2B                            | 7,338,799      | 2202               | 32.47                     |
| 2C                            | 8,310,257      | 2493               | 32.56                     |
| 3A                            | 7,105,842      | 2132               | 32.63                     |
| 3B                            | 6,731,403      | 2019               | 32.53                     |
| 3C                            | 6,202,795      | 1861               | 32.52                     |
| 4A                            | 7,596,456      | 2279               | 32.46                     |
| 4B                            | 6,943,381      | 2083               | 32.3                      |
| 4C                            | 6,937,674      | 2081               | 32.47                     |
| 5A                            | 7,144,571      | 2143               | 32.56                     |
| 5B                            | 6,860,069      | 2058               | 32.35                     |
| 5C                            | 5,727,812      | 1718               | 32.4                      |

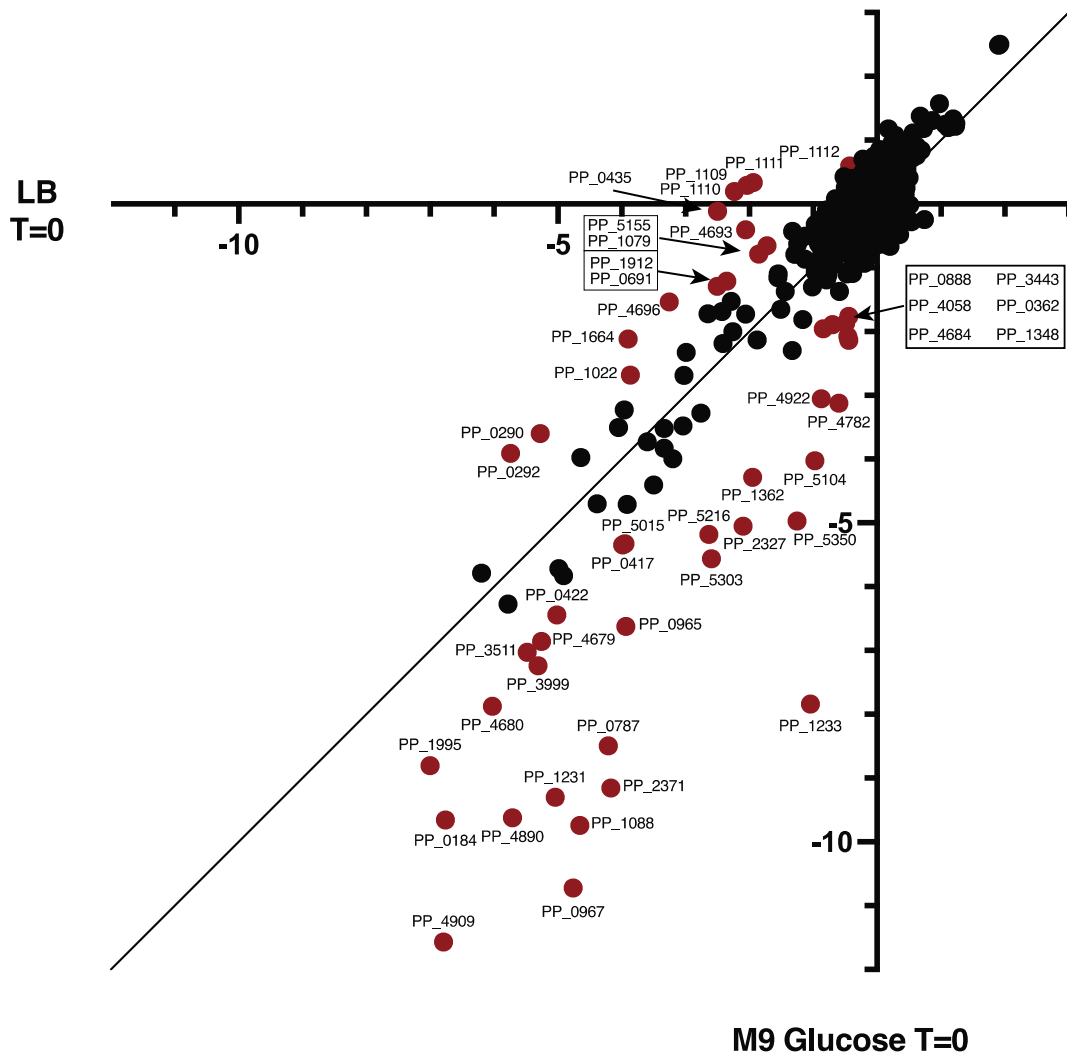

**Figure S1.** Fitness comparison for the M9 + 20 mM D-glucose enrichment condition using LB or M9 + 20 mM D-glucose inoculum (T=0) cultures. LB-derived mean fitness values are plotted on the X-axis and mean fitness derived from M9 + 20 mM D-glucose are plotted on the y-axis. Means values are taken from three biological replicates and genes with a mean fitness difference  $>|1|$  between the datasets have red markers and are labeled with locus tags.

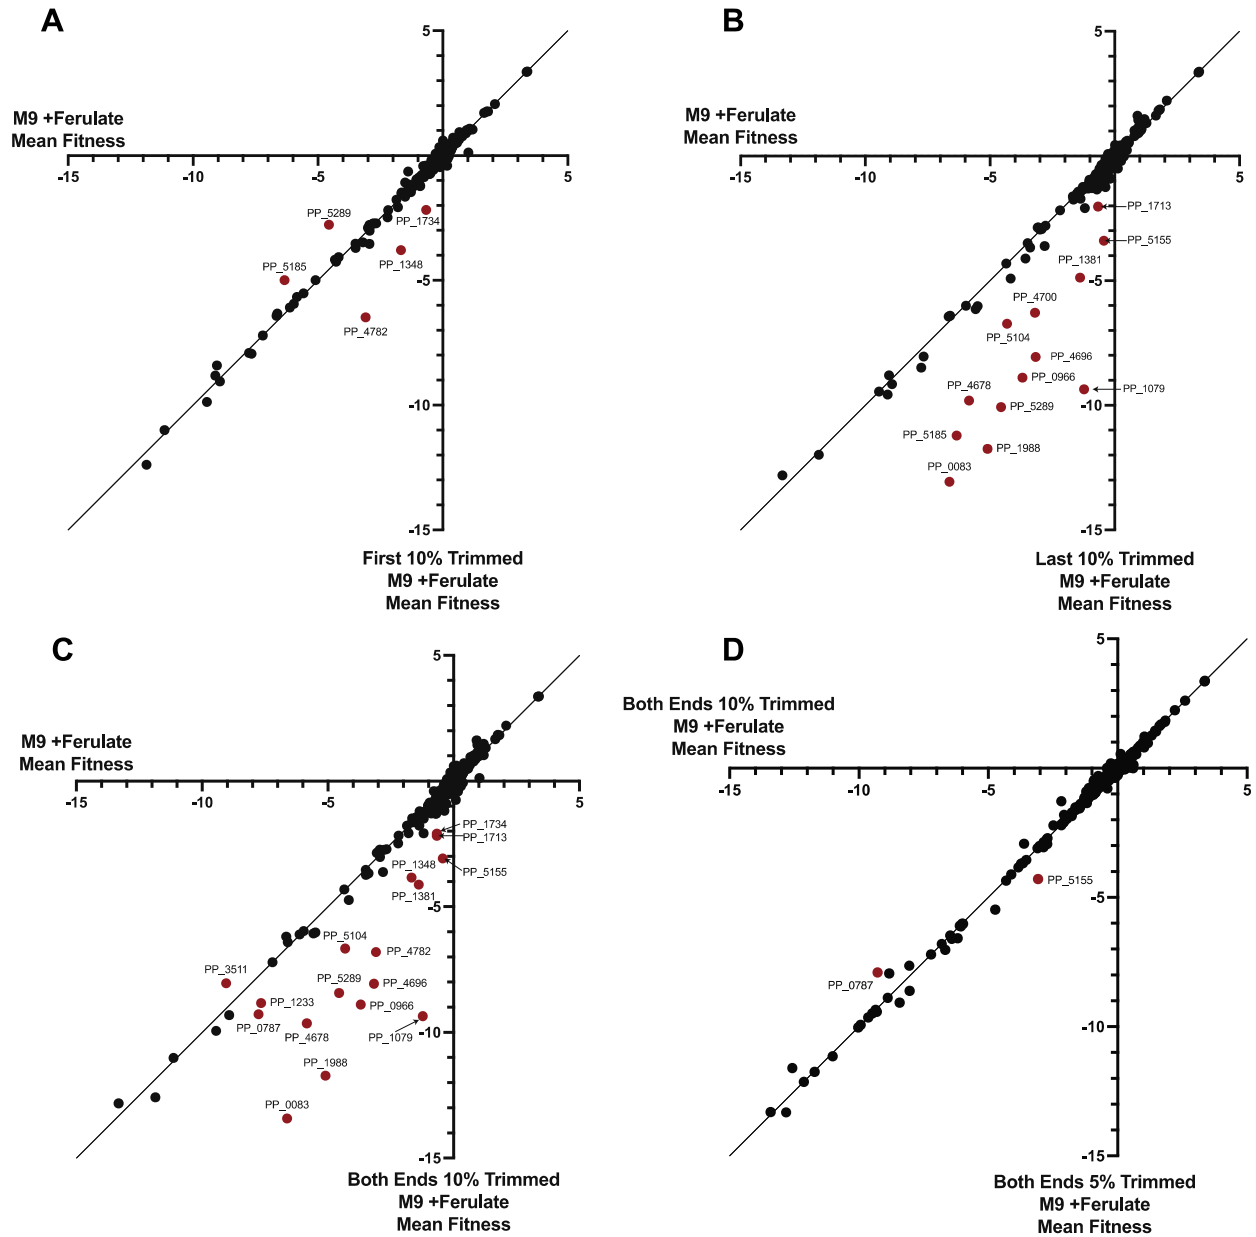

**Figure S2.** Fitness comparison for the M9 + 10 mM ferulate enrichment condition where (A-C) mean fitness derived from three biological replicates using non-trimmed data is plotted on the X-axis and mean fitness derived from three biological replicates using excluding counts from transposons localized within (A) the first 10% of a gene's coding DNA sequence (CDS), (B) the last 10% of a gene's CDS, or (C) the first and last 10% of a gene's CDS. (D) mean fitness derived from three biological replicates excluding counts from transposons localized with the first and last 10% of a gene's CDS on the X-axis vs. the first and last 5% of a gene's CDS. Genes with a mean fitness difference  $>|1|$  between the trimmed dataset and the non-trimmed dataset have red markers and are labeled with locus tags. No differences were statistically significant from the non-trimmed dataset using any of the trimming approaches ( $q$  value  $< 0.1$ ) (File S1).<sup>2,3</sup>

## REFERENCES

- (1) Wetmore, K. M.; Price, M. N.; Waters, R. J.; Lamson, J. S.; He, J.; Hoover, C. A.; Blow, M. J.; Bristow, J.; Butland, G.; Arkin, A. P. Rapid quantification of mutant fitness in diverse bacteria by sequencing randomly bar-coded transposons. *mBio* **2015**, *6* (3), e00306-00315. DOI: 10.1128/mBio.00306-15.
- (2) Benjamini, Y.; Hochberg, Y. Controlling the false discovery rate: A practical and powerful approach to multiple testing. *J. Roy. Stat. Soc. Ser. B. (Stat. Method.)* **1995**, *57* (1), 289-300. DOI: 10.1111/j.2517-6161.1995.tb02031.x.
- (3) Storey, J., D. The positive false discovery rate: a Bayesian interpretation and the  $q$ -value. *Ann. Stat.* **2003**, *31* (6), 2013-2035. DOI: 10.1214/aos/1074290335.
